# Supplementary material for: Standardized and reproducible measurement of decision-making in mice
Source: bioRxiv or medRxiv preprint supplement (doi:10.1101/2020.01.17.909838), 2020-10-09
Supplement: Supplementary file [file media-1.pdf]

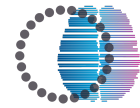

# Appendix 1: IBL protocol for headbar implant surgery in mice

The latest version of this protocol can be found [on Figshare via this specific link](#).

All IBL protocols cited in the article can be found [on Figshare via this master link](#).

The latest version of the CAD models and technical drawings for the manufactured rig parts can be found [on Figshare via this specific link](#).

The latest version of the whole rig CAD assembly can be found [on Figshare via this specific link](#).

**Please cite the associated article** when using any of these materials and protocols:

The International Brain Laboratory et al. (2020) *Standardized and reproducible measurement of decision-making in mice*. bioRxiv, 909838. <https://doi.org/10.1101/2020.01.17.909838>
